# Supplementary material
Source: publisher figshare collection journal article supplement (https://acs.figshare.com/ndownloader/files/10458124)
Supplement: Supplementary file 1 [file 10458124]

## Supporting Information

### Nonenzymatic Browning and Protein Aggregation in Royal Jelly during Room-Temperature Storage

Jiangtao Qiao<sup>a</sup>, Xueyu Wang<sup>a</sup>, Liqiang Liu<sup>c</sup>, Hongcheng Zhang<sup>a,b\*</sup>

<sup>a</sup>Institute of Apicultural Research, Chinese Academy of Agricultural Sciences, Beijing, 100093, China

<sup>b</sup>National Research Center of Bee Product Processing, Ministry of Agriculture, Beijing, 100093, China

<sup>c</sup>College of Life Sciences and Food Engineering, Hebei University of Engineering, Handan 056021, China;

\*Corresponding author: Tel: +86 10 62590442;  
Fax: +86 10 62590442;  
Email: 460414874@qq.com (H. Zhang)

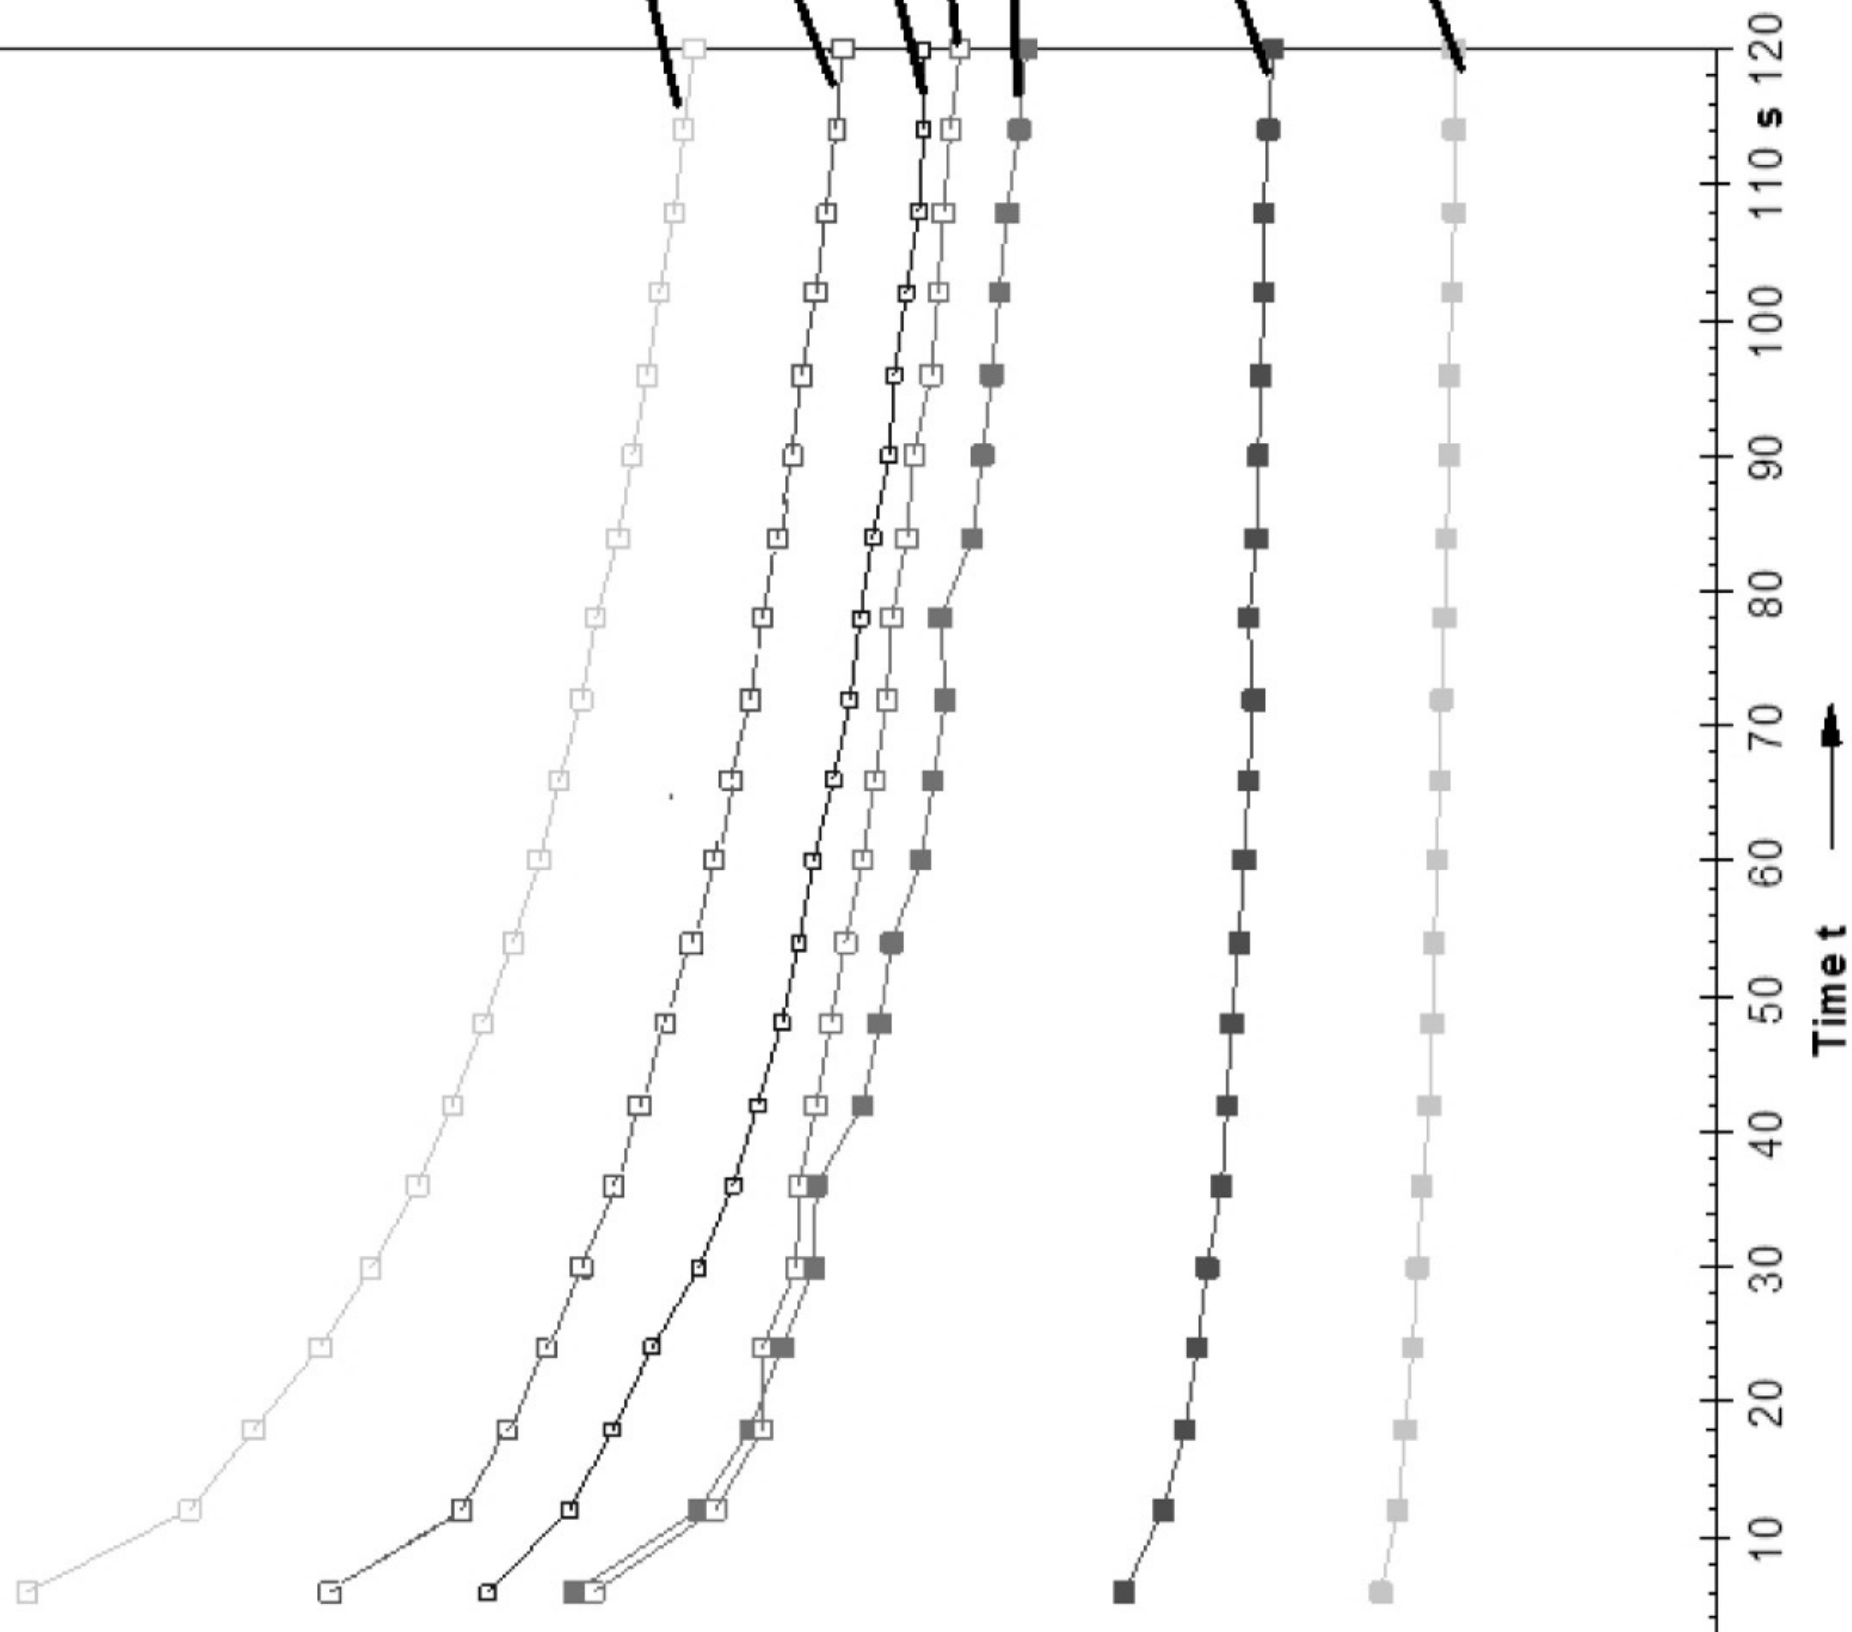

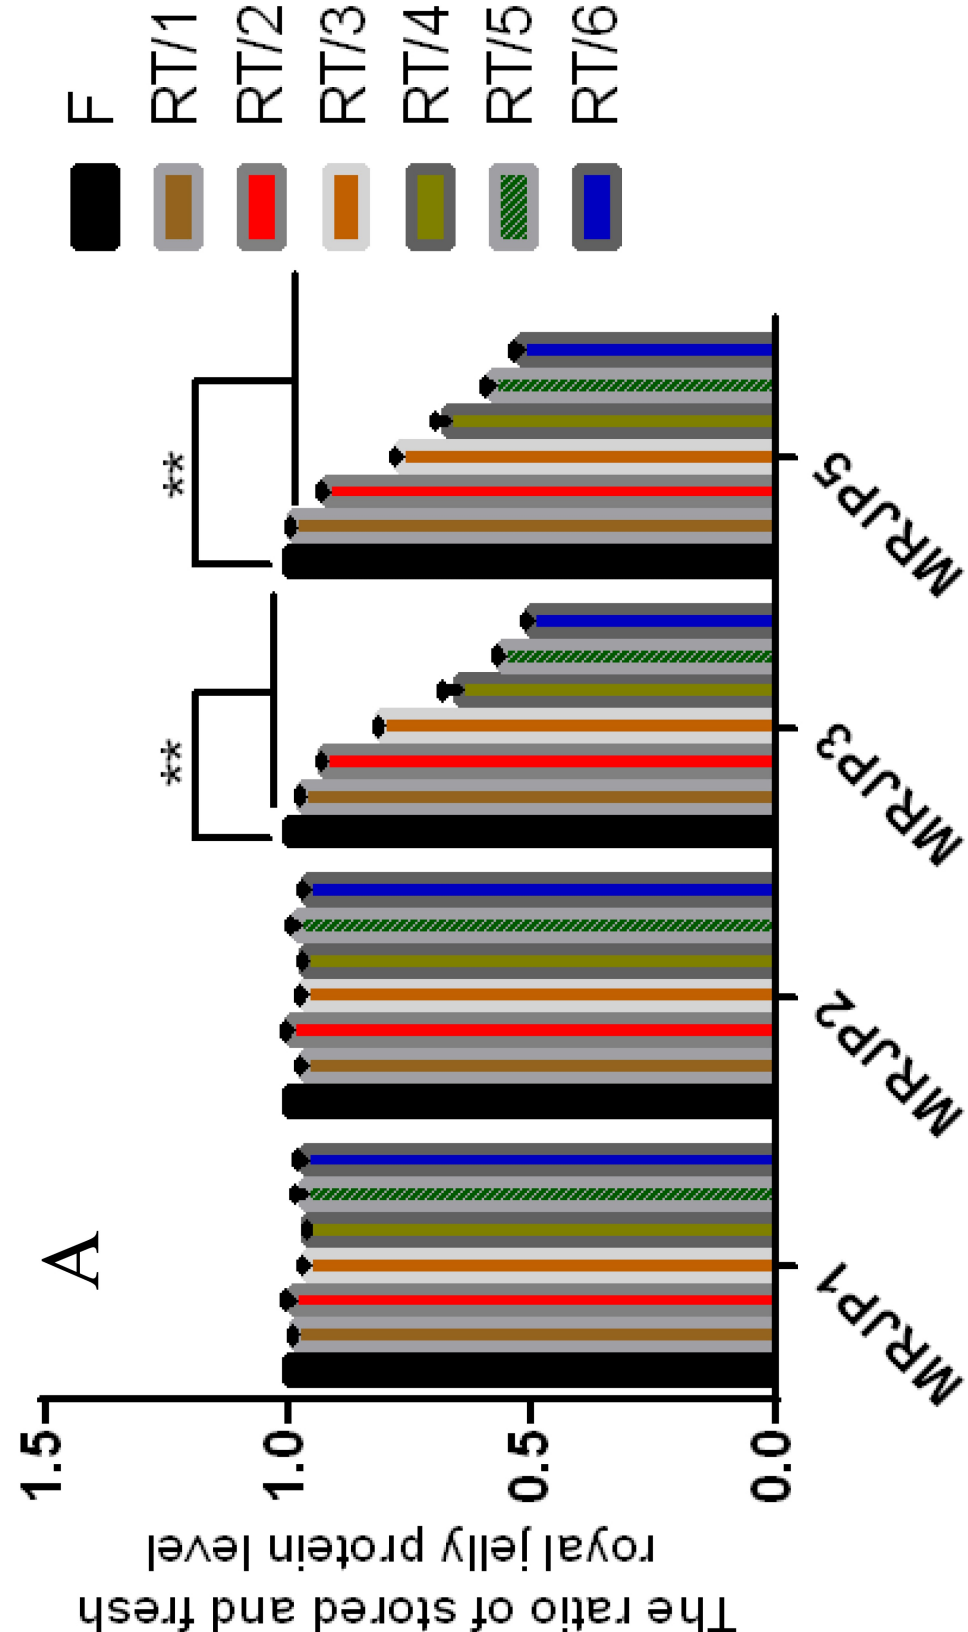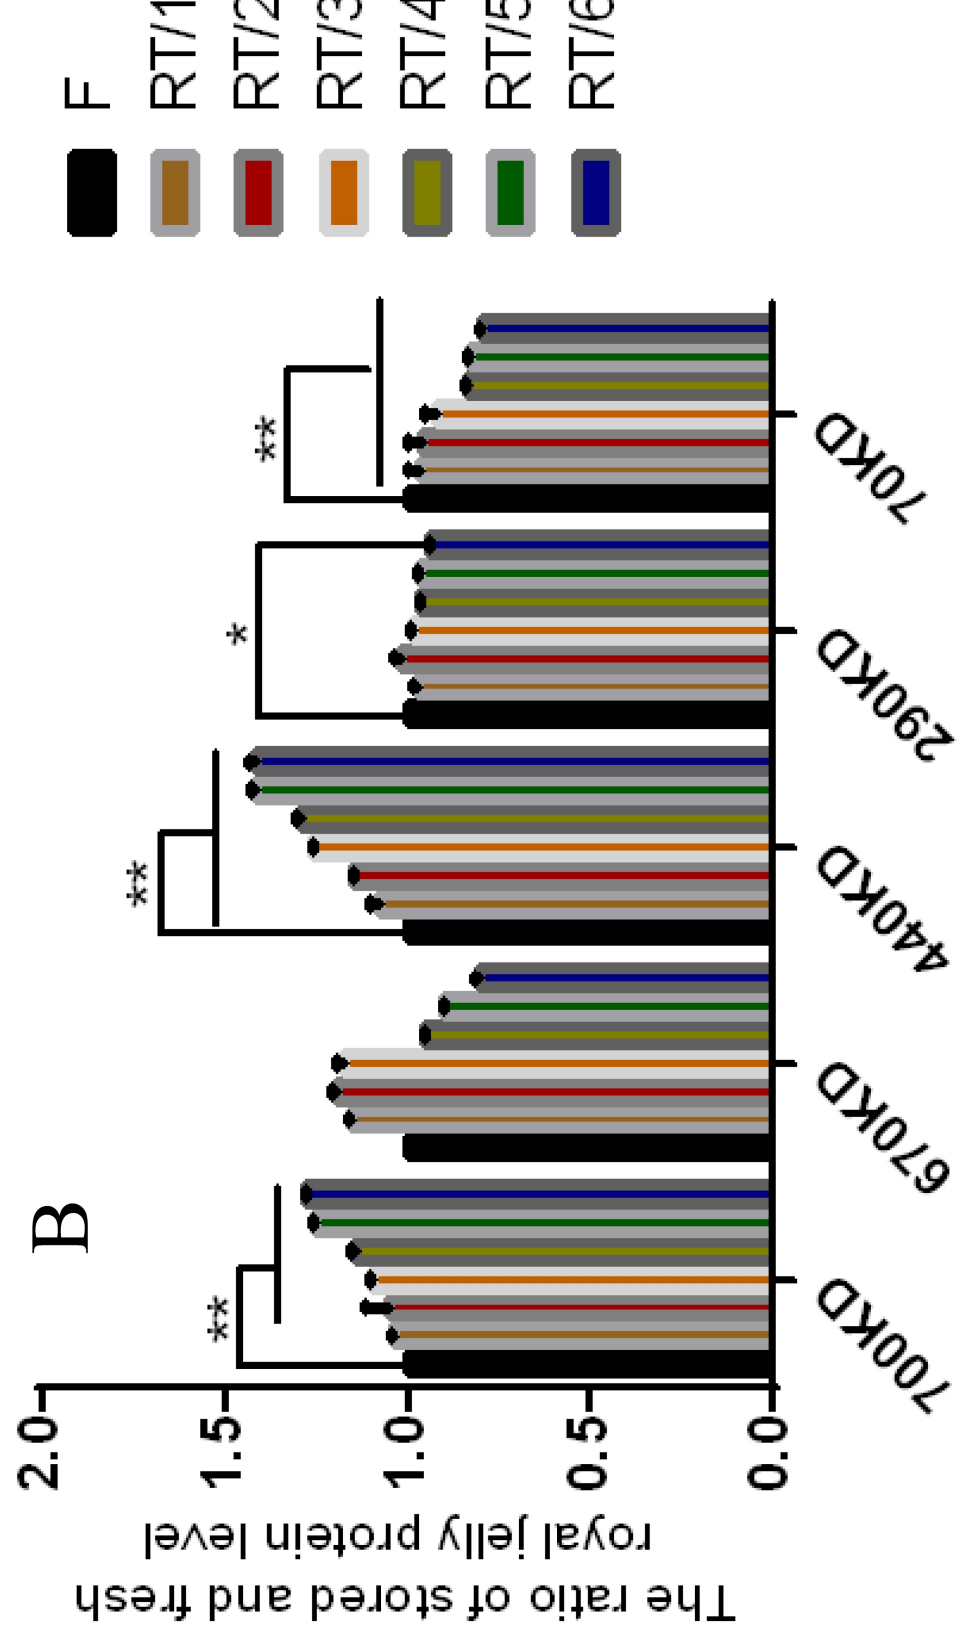

Supplementary figure. 1. The viscosity changes of royal jelly during room-temperature storage

Note: 1 The abscissa indicates the shear time and the ordinate indicates the viscosity of royal jelly sample.

2 RT/1 to RT/6 represents fresh and stored one to six months royal jelly sample.

Supplement figure. 2. The level ratio of stored t fresh royal jelly protein on SDS-PAGE (A) and Native-PAGE (B).

Note: lane F, fresh royal jelly; lane RT/1 to RT/6, royal jelly stored at room temperature one to six month.
